# Supplementary material for: The blood transcriptional signature for active and latent tuberculosis
Source: PubMed Central journal article supplement — Infect Drug Resist. 2019 Jan 30;12:321–8. doi: 10.2147/IDR.S184640 (PMC6363485; doi:10.2147/idr.s184640), 2019-01-30
Supplement: IDR-12-321-184640-1.pdf [file IDR-12-321-184640-1.pdf]

|                 | Dataset  | GSM ID    | Age | Gender    |
|-----------------|----------|-----------|-----|-----------|
| LTB_LON_tr001   | LON_tr   | GSM484448 |     | 34 Male   |
| PTB_LON_tr007   | LON_tr   | GSM484449 |     | 31 Male   |
| PTB_LON_tr020   | LON_tr   | GSM484451 |     | 48 Female |
| LTB_LON_tr010   | LON_tr   | GSM484452 |     | 30 Male   |
| LTB_LON_tr013   | LON_tr   | GSM484455 |     | 40 Female |
| PTB_LON_tr015   | LON_tr   | GSM484456 |     | 51 Male   |
| LTB_LON_tr008   | LON_tr   | GSM484458 |     | 43 Male   |
| PTB_LON_tr002   | LON_tr   | GSM484459 |     | 33 Female |
| LTB_LON_tr003   | LON_tr   | GSM484460 |     | 32 Male   |
| LTB_LON_tr029   | LON_tr   | GSM484461 |     | 23 Female |
| PTB_LON_tr031   | LON_tr   | GSM484463 |     | 22 Male   |
| LTB_LON_tr011   | LON_tr   | GSM484464 |     | 21 Female |
| PTB_LON_tr012   | LON_tr   | GSM484466 |     | 29 Male   |
| LTB_LON_tr006   | LON_tr   | GSM484467 |     | 30 Male   |
| PTB_LON_tr019   | LON_tr   | GSM484468 |     | 23 Female |
| LTB_LON_tr027   | LON_tr   | GSM484469 |     | 19 Male   |
| PTB_LON_tr018   | LON_tr   | GSM484470 |     | 27 Male   |
| LTB_LON_tr035   | LON_tr   | GSM484471 |     | 25 Female |
| PTB_LON_tr026   | LON_tr   | GSM484472 |     | 21 Female |
| LTB_LON_tr014   | LON_tr   | GSM484473 |     | 24 Female |
| PTB_LON_tr038   | LON_tr   | GSM484474 |     | 29 Male   |
| PTB_LON_tr037   | LON_tr   | GSM484475 |     | 72 Male   |
| LTB_LON_tr009   | LON_tr   | GSM484476 |     | 37 Female |
| PTB_LON_tr022   | LON_tr   | GSM484478 |     | 25 Female |
| LTB_LON-tr004   | LON_tr   | GSM484482 |     | 39 Female |
| LTB_LON_tr036   | LON_tr   | GSM484484 |     | 52 Female |
| PTB_LON_tr021   | LON_tr   | GSM484485 |     | 23 Female |
| LTB_LON_tr024   | LON_tr   | GSM484486 |     | 52 Male   |
| LTB_LON_tr005   | LON_tr   | GSM484488 |     | 32 Male   |
| LTB_LON_tr034   | LON_tr   | GSM484489 |     | 30 Female |
| PTB_LON_test001 | LON_test | GSM484595 |     | 66 Male   |
| PTB_LON_test002 | LON_test | GSM484596 |     | 41 Male   |
| PTB_LON_test003 | LON_test | GSM484597 |     | 40 Female |
| PTB_LON_test004 | LON_test | GSM484598 |     | 58 Male   |
| LTB_LON_test009 | LON_test | GSM484599 |     | 41 Male   |
| LTB_LON_test010 | LON_test | GSM484600 |     | 35 Female |
| LTB_LON_test012 | LON_test | GSM484601 |     | 28 Male   |
| LTB_LON_test013 | LON_test | GSM484602 |     | 53 Female |
| PTB_LON_test005 | LON_test | GSM484605 |     | 40 Male   |
| PTB_LON_test007 | LON_test | GSM484606 |     | 33 Male   |
| LTB_LON_test014 | LON_test | GSM484607 |     | 19 Female |
| LTB_LON_test016 | LON_test | GSM484608 |     | 20 Female |
| LTB_LON_test017 | LON_test | GSM484609 |     | 31 Male   |
| PTB_LON_test049 | LON_test | GSM484610 |     | 55 Female |
| PTB_LON_test023 | LON_test | GSM484611 |     | 18 Female |
| LTB_LON_test018 | LON_test | GSM484614 |     | 49 Male   |
| LTB_LON_test019 | LON_test | GSM484615 |     | 45 Male   |
| LTB_LON_test020 | LON_test | GSM484616 |     | 23 Male   |
| LTB_LON_test021 | LON_test | GSM484617 |     | 26 Male   |

|                 |          |           |           |
|-----------------|----------|-----------|-----------|
| PTB_LON_test026 | LON_test | GSM484618 | 31 Male   |
| PTB_LON_test027 | LON_test | GSM484619 | 22 Male   |
| PTB_LON_test028 | LON_test | GSM484620 | 26 Male   |
| PTB_LON_test032 | LON_test | GSM484621 | 32 Male   |
| LTB_LON_test022 | LON_test | GSM484624 | 33 Male   |
| LTB_LON_test024 | LON_test | GSM484625 | 29 Male   |
| LTB_LON_test025 | LON_test | GSM484626 | 44 Female |
| LTB_LON_test033 | LON_test | GSM484627 | 24 Female |
| PTB_LON_test034 | LON_test | GSM484628 | 34 Female |
| PTB_LON_test053 | LON_test | GSM484629 | 75 Male   |
| PTB_LON_test054 | LON_test | GSM484630 | 64 Female |
| PTB_LON_test006 | LON_test | GSM484631 | 53 Male   |
| LTB_LON_test008 | LON_test | GSM484635 | 68 Male   |
| LTB_LON_test011 | LON_test | GSM484636 | 24 Female |
| LTB_LON_test015 | LON_test | GSM484637 | 27 Female |
| PTB_LON_test031 | LON_test | GSM484638 | 28 Male   |
| PTB_LON_test050 | LON_test | GSM484639 | 54 Female |
| LTB_LON_test043 | LON_test | GSM484640 | 60 Female |
| PTB_LON_test051 | LON_test | GSM484641 | 23 Male   |
| PTB_LON_test052 | LON_test | GSM484642 | 78 Female |
| LTB_LON_test029 | LON_test | GSM484643 | 42 Female |
| PTB_LON_test042 | LON_test | GSM484645 | 20 Female |
| LTB_LON_test030 | LON_test | GSM484646 | 41 Female |
| PTB_SA_val001   | SA_val   | GSM484500 | 22 Male   |
| PTB_SA_val002   | SA_val   | GSM484501 | 21 Female |
| PTB_SA_val003   | SA_val   | GSM484502 | 27 Male   |
| PTB_SA_val004   | SA_val   | GSM484503 | 25 Male   |
| LTB_SA_val021   | SA_val   | GSM484504 | 33 Female |
| LTB_SA_val022   | SA_val   | GSM484505 | 19 Female |
| LTB_SA_val023   | SA_val   | GSM484506 | 21 Male   |
| LTB_SA_val024   | SA_val   | GSM484507 | 20 Female |
| LTB_SA_val025   | SA_val   | GSM484508 | 24 Female |
| LTB_SA_val026   | SA_val   | GSM484509 | 22 Female |
| LTB_SA_val027   | SA_val   | GSM484510 | 24 Male   |
| LTB_SA_val028   | SA_val   | GSM484511 | 18 Female |
| LTB_SA_val029   | SA_val   | GSM484512 | 18 Female |
| LTB_SA_val030   | SA_val   | GSM484513 | 24 Female |
| LTB_SA_val031   | SA_val   | GSM484514 | 22 Male   |
| PTB_SA_val005   | SA_val   | GSM484515 | 25 Male   |
| PTB_SA_val006   | SA_val   | GSM484516 | 47 Male   |
| PTB_SA_val007   | SA_val   | GSM484517 | 32 Female |
| PTB_SA_val008   | SA_val   | GSM484518 | 40 Male   |
| PTB_SA_val009   | SA_val   | GSM484519 | 46 Female |
| LTB_SA_val032   | SA_val   | GSM484520 | 18 Male   |
| LTB_SA_val033   | SA_val   | GSM484521 | 18 Male   |
| LTB_SA_val034   | SA_val   | GSM484522 | 18 Female |
| LTB_SA_val035   | SA_val   | GSM484523 | 20 Female |
| PTB_SA_val010   | SA_val   | GSM484524 | 42 Male   |
| PTB_SA_val011   | SA_val   | GSM484525 | 48 Female |
| PTB_SA_val012   | SA_val   | GSM484526 | 27 Male   |

|               |        |           |           |
|---------------|--------|-----------|-----------|
| PTB_SA_val013 | SA_val | GSM484527 | 45 Male   |
| LTB_SA_val037 | SA_val | GSM484528 | 21 Male   |
| LTB_SA_val038 | SA_val | GSM484529 | 24 Female |
| LTB_SA_val039 | SA_val | GSM484530 | 21 Male   |
| LTB_SA_val040 | SA_val | GSM484531 | 27 Female |
| LTB_SA_val041 | SA_val | GSM484532 | 24 Male   |
| PTB_SA_val014 | SA_val | GSM484533 | 23 Male   |
| PTB_SA_val015 | SA_val | GSM484534 | 24 Female |
| PTB_SA_val016 | SA_val | GSM484535 | 38 Male   |
| PTB_SA_val017 | SA_val | GSM484536 | 27 Male   |
| LTB_SA_val043 | SA_val | GSM484537 | 18 Female |
| LTB_SA_val044 | SA_val | GSM484538 | 20 Female |
| LTB_SA_val045 | SA_val | GSM484539 | 24 Female |
| LTB_SA_val046 | SA_val | GSM484540 | 22 Male   |
| LTB_SA_val047 | SA_val | GSM484541 | 26 Male   |
| LTB_SA_val048 | SA_val | GSM484542 | 24 Male   |
| PTB_SA_val018 | SA_val | GSM484543 | 31 Male   |
| PTB_SA_val019 | SA_val | GSM484544 | 41 Male   |
| PTB_SA_val020 | SA_val | GSM484545 | 42 Male   |
| LTB_SA_val036 | SA_val | GSM484546 | 21 Female |
| LTB_SA_val042 | SA_val | GSM484547 | 23 Female |
| LTB_SA_val049 | SA_val | GSM484548 | 19 Female |
| LTB_SA_val050 | SA_val | GSM484549 | 20 Female |
| LTB_SA_val051 | SA_val | GSM484550 | 23 Female |
