# Supplementary material for: The blood transcriptional signature for active and latent tuberculosis
Source: PubMed Central journal article supplement — Infect Drug Resist. 2019 Jan 30;12:321–8. doi: 10.2147/IDR.S184640 (PMC6363485; doi:10.2147/idr.s184640), 2019-01-30
Supplement: IDR-12-321-184640-2.pdf [file IDR-12-321-184640-2.pdf]

| Rank | Name      |
|------|-----------|
| 1    | HNRNPD    |
| 2    | CYBB      |
| 3    | TSPO      |
| 4    | SLC9A3R1  |
| 5    | LOXL3     |
| 6    | CA5B      |
| 7    | GPR63     |
| 8    | C15orf15  |
| 9    | FNBP4     |
| 10   | EPHA4     |
| 11   | ANAPC1    |
| 12   | QSOX2     |
| 13   | NELL2     |
| 14   | LYRM1     |
| 15   | KIAA1370  |
| 16   | ZNF91     |
| 17   | TMEM51    |
| 18   | TRIB2     |
| 19   | BANK1     |
| 20   | TUSC4     |
| 21   | CYB561    |
| 22   | PRKCQ     |
| 23   | CD36      |
| 24   | STAT1     |
| 25   | STOM      |
| 26   | OBFC1     |
| 27   | ASGR2     |
| 28   | HSPC171   |
| 29   | FCRLA     |
| 30   | C5        |
| 31   | FCGBP     |
| 32   | WDFY1     |
| 33   | WDR75     |
| 34   | RAB40B    |
| 35   | AQP10     |
| 36   | WDR82     |
| 37   | CCDC34    |
| 38   | C12orf29  |
| 39   | HIST1H2BK |
| 40   | PRELID1   |
| 41   | SFRS2     |
| 42   | CASP1     |
| 43   | TMEM41B   |
| 44   | GZMK      |
| 45   | FRMD3     |
| 46   | C9orf72   |
| 47   | CRY1      |
| 48   | FAM44B    |
| 49   | C6orf166  |

|    |           |
|----|-----------|
| 50 | CDCP1     |
| 51 | GAS8      |
| 52 | DCUN1D4   |
| 53 | HORMAD1   |
| 54 | FNBP1     |
| 55 | DUSP3     |
| 56 | SLTM      |
| 57 | FER1L3    |
| 58 | KCNJ15    |
| 59 | RPS16     |
| 60 | CD79A     |
| 61 | CAMSAP1   |
| 62 | GRN       |
| 63 | WDR21A    |
| 64 | GZMM      |
| 65 | MMS19L    |
| 66 | C10orf104 |
| 67 | LTA4H     |
| 68 | RASSF7    |
| 69 | IL32      |
| 70 | RPL10A    |
| 71 | TMEM165   |
| 72 | CTSA      |
| 73 | GOLGA8B   |
| 74 | PDK3      |
| 75 | OSBPL10   |
| 76 | TTYH3     |
| 77 | PRPF19    |
| 78 | ZMYND15   |
| 79 | ZNF529    |
| 80 | HIST1H2BC |
| 81 | SLC6A12   |
| 82 | FAIM3     |
| 83 | MTR       |
| 84 | CD6       |
| 85 | DTNBP1    |
| 86 | SGCE      |
| 87 | IL15      |
| 88 | HIST2H2BE |
| 89 | NPAT      |
| 90 | SLC25A26  |
| 91 | SORT1     |
| 92 | CSNK1E    |
| 93 | SRBD1     |
| 94 | CTSD      |
| 95 | SPIB      |
| 96 | BIN1      |
| 97 | SCAND1    |
| 98 | SIDT1     |
| 99 | EPB41L3   |

|     |               |
|-----|---------------|
| 100 | ATP6V0A1      |
| 101 | PSMB3         |
| 102 | LONP2         |
| 103 | UBE2G2        |
| 104 | FLVCR2        |
| 105 | DKFZp761P0423 |
| 106 | TJP2          |
| 107 | LOC649821     |
| 108 | SLITRK4       |
| 109 | VIL2          |
| 110 | MST4          |
| 111 | PGD           |
| 112 | RPS10         |
| 113 | NGFRAP1       |
| 114 | BLK           |
| 115 | AGTRAP        |
| 116 | MCTP1         |
| 117 | RPS18         |
| 118 | TAPBP         |
| 119 | TPD52         |
| 120 | ANKMY2        |
| 121 | ADAM7         |
| 122 | PCYOX1        |
| 123 | HNRPDL        |
| 124 | LOC653658     |
| 125 | ZNF438        |
| 126 | NPC2          |
| 127 | HNRPA1L-2     |
| 128 | EIF2AK3       |
| 129 | RALA          |
| 130 | SLC4A7        |
| 131 | LACTB         |
| 132 | ZNF548        |
| 133 | CYBASC3       |
| 134 | DHRS7B        |
| 135 | NLRC4         |
| 136 | MFSD7         |
| 137 | KIAA1641      |
| 138 | CBARA1        |
| 139 | HTATIP2       |
| 140 | M-RIP         |
| 141 | PSCD1         |
| 142 | SLC30A1       |
| 143 | HDDC2         |
| 144 | IRF1          |
| 145 | DHX15         |
| 146 | PSMB8         |
| 147 | TMC6          |
| 148 | LHFPL2        |
| 149 | SLU7          |

|     |           |
|-----|-----------|
| 150 | EOMES     |
| 151 | SPATA2L   |
| 152 | EXOSC10   |
| 153 | SIGLECP16 |
| 154 | SPECC1L   |
| 155 | WDR54     |
| 156 | ZSCAN18   |
| 157 | ZC3H3     |
| 158 | IL1B      |
| 159 | CDR2      |
| 160 | ZNF545    |
| 161 | PLEKHF1   |
| 162 | FCER1G    |
| 163 | TEX10     |
| 164 | ID3       |
| 165 | HNRPA1P4  |
| 166 | C2        |
| 167 | TREML1    |
| 168 | CDC25B    |
| 169 | ZNF559    |
| 170 | MTF1      |
| 171 | PPP1R2    |
| 172 | ARIH2     |
| 173 | LOC492311 |
| 174 | MALT1     |
| 175 | SCARF1    |
| 176 | PANK2     |
| 177 | LOC400986 |
| 178 | DRAM      |
| 179 | LOC728888 |
| 180 | ZBED5     |
| 181 | LOC728014 |
| 182 | BUB3      |
| 183 | RERE      |
| 184 | JAK2      |
| 185 | PTPN11    |
| 186 | TSEN54    |
| 187 | LOC153364 |
| 188 | DHRS9     |
| 189 | GOLGA8A   |
| 190 | SLAMF1    |
| 191 | MTHFD2    |
| 192 | KCNJ2     |
| 193 | RHBDF2    |
| 194 | MPHOSPH1  |
| 195 | MFNG      |
| 196 | FLJ22662  |
| 197 | TBC1D10C  |
| 198 | C14orf135 |
| 199 | YIPF1     |

|     |            |
|-----|------------|
| 200 | KIAA0020   |
| 201 | UBE2L6     |
| 202 | ATOX1      |
| 203 | RPL3       |
| 204 | ZNF331     |
| 205 | APOL2      |
| 206 | CD47       |
| 207 | CCDC102A   |
| 208 | EMG1       |
| 209 | ZNF544     |
| 210 | OSM        |
| 211 | TMEM149    |
| 212 | GTPBP4     |
| 213 | DYRK2      |
| 214 | CEBPZ      |
| 215 | GNG7       |
| 216 | PGS1       |
| 217 | ZNF146     |
| 218 | HSP90AB1   |
| 219 | COP1       |
| 220 | UPF3A      |
| 221 | LOC651143  |
| 222 | ABHD2      |
| 223 | PCID2      |
| 224 | GPD1L      |
| 225 | SP4        |
| 226 | LCK        |
| 227 | CEACAM1    |
| 228 | LOC648710  |
| 229 | ZMAT5      |
| 230 | SLC7A6     |
| 231 | GRAP       |
| 232 | GNA15      |
| 233 | C20orf24   |
| 234 | CYCS       |
| 235 | RASGRP1    |
| 236 | HIST2H2AC  |
| 237 | NUP88      |
| 238 | TYSND1     |
| 239 | C16orf7    |
| 240 | CCDC45     |
| 241 | HPSE       |
| 242 | ECGF1      |
| 243 | GPR18      |
| 244 | FAM102A    |
| 245 | SLC38A1    |
| 246 | HIST2H2AA3 |
| 247 | FAM84B     |
| 248 | SF3A3      |
| 249 | EEF1B2     |

|     |           |
|-----|-----------|
| 250 | ZCCHC11   |
| 251 | IL2RB     |
| 252 | SPOCK2    |
| 253 | LOC649447 |
| 254 | PYHIN1    |
| 255 | NUP43     |
| 256 | LOC732371 |
| 257 | KLRB1     |
| 258 | HIST1H3D  |
| 259 | DSE       |
| 260 | C19orf2   |
| 261 | TBC1D4    |
| 262 | KIAA1632  |
| 263 | TAP1      |
| 264 | CYFIP2    |
| 265 | ALPK1     |
| 266 | GLS       |
| 267 | PLAGL1    |
| 268 | TFB2M     |
| 269 | POLR1C    |
| 270 | LOC643433 |
| 271 | CD19      |
| 272 | ATG3      |
| 273 | BACH2     |
| 274 | PHF15     |
| 275 | IGF2BP3   |
| 276 | KIAA0372  |
| 277 | COMMMD6   |
| 278 | IFI30     |
| 279 | LOC730316 |
| 280 | MGC3207   |
| 281 | LPCAT2    |
| 282 | KLF9      |
| 283 | C12orf47  |
| 284 | ZNF302    |
| 285 | CD63      |
| 286 | ABCB1     |
| 287 | RPUSD4    |
| 288 | TXNDC12   |
| 289 | CD7       |
| 290 | PPP1R10   |
| 291 | GYG1      |
| 292 | MEX3C     |
| 293 | LOC440731 |
| 294 | GBP5      |
| 295 | AFF3      |
| 296 | FAM62A    |
| 297 | KLF12     |
| 298 | METAP2    |
| 299 | TSHZ3     |

|     |           |
|-----|-----------|
| 300 | C11orf82  |
| 301 | ZBTB20    |
| 302 | ETV6      |
| 303 | GBP2      |
| 304 | GIMAP7    |
| 305 | RUNX3     |
| 306 | DYNLT1    |
| 307 | HINT1     |
| 308 | CXCR5     |
| 309 | MAGEE1    |
| 310 | CCDC66    |
| 311 | SIRPB1    |
| 312 | AES       |
| 313 | MEF2D     |
| 314 | RRAS2     |
| 315 | STX11     |
| 316 | C2orf29   |
| 317 | DPH5      |
| 318 | ZNF621    |
| 319 | TBC1D8    |
| 320 | ZZZ3      |
| 321 | NDUFV1    |
| 322 | LYAR      |
| 323 | METTL3    |
| 324 | CREB5     |
| 325 | TRIM21    |
| 326 | TOMM40    |
| 327 | NPIP      |
| 328 | ZNF329    |
| 329 | PVRIG     |
| 330 | GLTSCR2   |
| 331 | LOC728744 |
| 332 | RPL13A    |
| 333 | NOL11     |
| 334 | PPP3CC    |
| 335 | CERK      |
| 336 | ITGAM     |
| 337 | SLAIN1    |
| 338 | CARD11    |
| 339 | MSRB2     |
| 340 | LTB4R     |
| 341 | NKTR      |
| 342 | SMARCD3   |
| 343 | ZNF721    |
| 344 | SLC25A42  |
| 345 | BRI3      |
| 346 | PLAG1     |
| 347 | TOMM7     |
| 348 | PSTPIP2   |
| 349 | SMAD3     |

|     |           |
|-----|-----------|
| 350 | PSME1     |
| 351 | CNIH4     |
| 352 | ETS1      |
| 353 | CLYBL     |
| 354 | SLC25A44  |
| 355 | DNAJC9    |
| 356 | CCDC76    |
| 357 | SNRPF     |
| 358 | LOC440737 |
| 359 | IMP3      |
| 360 | ACYP1     |
| 361 | PARP9     |
| 362 | ZNF831    |
| 363 | LY9       |
| 364 | SESN1     |
| 365 | EPRS      |
| 366 | LOC730432 |
| 367 | KIAA0355  |
| 368 | CCDC65    |
| 369 | TGDS      |
| 370 | NOL5A     |
| 371 | ASF1A     |
| 372 | PIK3IP1   |
| 373 | TTC27     |
| 374 | GADD45B   |
| 375 | NCALD     |
| 376 | C12orf41  |
| 377 | BHLHB2    |
| 378 | GIMAP5    |
| 379 | ANGEL2    |
| 380 | CD81      |
| 381 | SECTM1    |
| 382 | MGC52498  |
| 383 | PRKCH     |
| 384 | SERBP1    |
| 385 | TH1L      |
| 386 | MXD4      |
| 387 | CXorf57   |
| 388 | PSG3      |
| 389 | RPS4X     |
| 390 | SH2D1A    |
| 391 | CD40LG    |
| 392 | GGA2      |
| 393 | GARNL1    |
| 394 | SKAP1     |
| 395 | PWP1      |
| 396 | OGT       |
| 397 | LANCL1    |
| 398 | PABPC4    |
| 399 | LBH       |



|     |           |
|-----|-----------|
| 400 | MAGED1    |
| 401 | RPL27     |
| 402 | ATG7      |
| 403 | SBK1      |
| 404 | ECHDC2    |
| 405 | NCF1C     |
| 406 | PLEKHA1   |
| 407 | RTTN      |
| 408 | SNORD13   |
| 409 | CSE1L     |
| 410 | TRAF3IP3  |
| 411 | USP24     |
| 412 | ASPHD2    |
| 413 | MAP4K1    |
| 414 | ITM2A     |
| 415 | MGC3020   |
| 416 | BMS1      |
| 417 | IL7R      |
| 418 | AP4B1     |
| 419 | RAB24     |
| 420 | TRAF5     |
| 421 | FOXO1     |
| 422 | NMT2      |
| 423 | WDR6      |
| 424 | EBI2      |
| 425 | ROPN1L    |
| 426 | KTELC1    |
| 427 | ALS2CR13  |
| 428 | CLEC2D    |
| 429 | PLAUR     |
| 430 | SDAD1     |
| 431 | IARS      |
| 432 | SS18L2    |
| 433 | POLB      |
| 434 | OCIAD2    |
| 435 | ZMYND11   |
| 436 | SNRPA1    |
| 437 | SFRS6     |
| 438 | MTX3      |
| 439 | NUP160    |
| 440 | KIAA1147  |
| 441 | ARHGEF18  |
| 442 | LOC642250 |
| 443 | SQRDL     |
| 444 | RNGTT     |
| 445 | ZAP70     |
| 446 | LOC647856 |
| 447 | RPL17     |
| 448 | CD28      |
| 449 | CD3D      |

450 LOC644511  
451 AKAP11  
452 MRFAP1L1  
453 ATP6V0E2  
454 LOC653610  
455 ICOS  
456 ITPR3  
457 P2RY8  
458 TOP2B  
459 ARL5A  
460 CD96  
461 ZBTB25  
462 UBE2Q2  
463 CCNB1IP1  
464 PRKRIR  
465 TIGA1  
466 EDG1  
467 FBXO21  
468 TMEM50B  
469 XPO4  
470 RPL5  
471 TMEM181  
472 TP53RK  
473 RPUSD2  
474 CD52  
475 CASP4  
476 LOC646766  
477 BMI1  
478 ATIC  
479 TTC3  
480 ZBTB4  
481 NOC3L  
482 ANKRD46  
483 SLAMF6  
484 SAE1  
485 RPS17  
486 CD247  
487 ZNF22  
488 CCND2  
489 DDX18  
490 GAS7  
491 FAM62B  
492 BCL11B  
493 METAP1  
494 STAT4  
495 CCDC25  
496 RPL22  
497 ITK  
498 CD2  
499 LOC203547
