# Supplementary material for: The blood transcriptional signature for active and latent tuberculosis
Source: PubMed Central journal article supplement — Infect Drug Resist. 2019 Jan 30;12:321–8. doi: 10.2147/IDR.S184640 (PMC6363485; doi:10.2147/idr.s184640), 2019-01-30
Supplement: IDR-12-321-184640-3.pdf [file IDR-12-321-184640-3.pdf]

| N  | TP | FP | TN | FN | SN       | SP       | ACC      | MCC      |
|----|----|----|----|----|----------|----------|----------|----------|
| 2  | 42 | 8  | 61 | 12 | 0.777778 | 0.884058 | 0.837398 | 0.668691 |
| 3  | 42 | 9  | 60 | 12 | 0.777778 | 0.869565 | 0.829268 | 0.652085 |
| 4  | 38 | 6  | 63 | 16 | 0.703704 | 0.913043 | 0.821138 | 0.638541 |
| 5  | 42 | 6  | 63 | 12 | 0.777778 | 0.913043 | 0.853659 | 0.702807 |
| 6  | 41 | 7  | 62 | 13 | 0.759259 | 0.898551 | 0.837398 | 0.669223 |
| 7  | 43 | 9  | 60 | 11 | 0.796296 | 0.869565 | 0.837398 | 0.66892  |
| 8  | 46 | 6  | 63 | 8  | 0.851852 | 0.913043 | 0.886179 | 0.768409 |
| 9  | 47 | 6  | 63 | 7  | 0.87037  | 0.913043 | 0.894309 | 0.785101 |
| 10 | 47 | 7  | 62 | 7  | 0.87037  | 0.898551 | 0.886179 | 0.768921 |
| 11 | 48 | 7  | 62 | 6  | 0.888889 | 0.898551 | 0.894309 | 0.785964 |
| 12 | 47 | 7  | 62 | 7  | 0.87037  | 0.898551 | 0.886179 | 0.768921 |
| 13 | 47 | 7  | 62 | 7  | 0.87037  | 0.898551 | 0.886179 | 0.768921 |
| 14 | 46 | 7  | 62 | 8  | 0.851852 | 0.898551 | 0.878049 | 0.752019 |
| 15 | 44 | 7  | 62 | 10 | 0.814815 | 0.898551 | 0.861789 | 0.718592 |
| 16 | 44 | 7  | 62 | 10 | 0.814815 | 0.898551 | 0.861789 | 0.718592 |
| 17 | 48 | 8  | 61 | 6  | 0.888889 | 0.884058 | 0.886179 | 0.770264 |
| 18 | 47 | 7  | 62 | 7  | 0.87037  | 0.898551 | 0.886179 | 0.768921 |
| 19 | 47 | 7  | 62 | 7  | 0.87037  | 0.898551 | 0.886179 | 0.768921 |
| 20 | 47 | 7  | 62 | 7  | 0.87037  | 0.898551 | 0.886179 | 0.768921 |
| 21 | 48 | 7  | 62 | 6  | 0.888889 | 0.898551 | 0.894309 | 0.785964 |
| 22 | 48 | 6  | 63 | 6  | 0.888889 | 0.913043 | 0.902439 | 0.801932 |
| 23 | 48 | 6  | 63 | 6  | 0.888889 | 0.913043 | 0.902439 | 0.801932 |
| 24 | 49 | 6  | 63 | 5  | 0.907407 | 0.913043 | 0.910569 | 0.818914 |
| 25 | 46 | 7  | 62 | 8  | 0.851852 | 0.898551 | 0.878049 | 0.752019 |
| 26 | 48 | 5  | 64 | 6  | 0.888889 | 0.927536 | 0.910569 | 0.818184 |
| 27 | 47 | 5  | 64 | 7  | 0.87037  | 0.927536 | 0.902439 | 0.801572 |
| 28 | 47 | 5  | 64 | 7  | 0.87037  | 0.927536 | 0.902439 | 0.801572 |
| 29 | 48 | 5  | 64 | 6  | 0.888889 | 0.927536 | 0.910569 | 0.818184 |
| 30 | 48 | 5  | 64 | 6  | 0.888889 | 0.927536 | 0.910569 | 0.818184 |
| 31 | 48 | 6  | 63 | 6  | 0.888889 | 0.913043 | 0.902439 | 0.801932 |
| 32 | 48 | 5  | 64 | 6  | 0.888889 | 0.927536 | 0.910569 | 0.818184 |
| 33 | 48 | 6  | 63 | 6  | 0.888889 | 0.913043 | 0.902439 | 0.801932 |
| 34 | 48 | 6  | 63 | 6  | 0.888889 | 0.913043 | 0.902439 | 0.801932 |
| 35 | 48 | 6  | 63 | 6  | 0.888889 | 0.913043 | 0.902439 | 0.801932 |
| 36 | 47 | 6  | 63 | 7  | 0.87037  | 0.913043 | 0.894309 | 0.785101 |
| 37 | 47 | 6  | 63 | 7  | 0.87037  | 0.913043 | 0.894309 | 0.785101 |
| 38 | 47 | 6  | 63 | 7  | 0.87037  | 0.913043 | 0.894309 | 0.785101 |
| 39 | 46 | 5  | 64 | 8  | 0.851852 | 0.927536 | 0.894309 | 0.785098 |
| 40 | 47 | 4  | 65 | 7  | 0.87037  | 0.942029 | 0.910569 | 0.818351 |
| 41 | 47 | 4  | 65 | 7  | 0.87037  | 0.942029 | 0.910569 | 0.818351 |
| 42 | 46 | 4  | 65 | 8  | 0.851852 | 0.942029 | 0.902439 | 0.802103 |
| 43 | 46 | 5  | 64 | 8  | 0.851852 | 0.927536 | 0.894309 | 0.785098 |
| 44 | 48 | 5  | 64 | 6  | 0.888889 | 0.927536 | 0.910569 | 0.818184 |
| 45 | 47 | 4  | 65 | 7  | 0.87037  | 0.942029 | 0.910569 | 0.818351 |
| 46 | 47 | 4  | 65 | 7  | 0.87037  | 0.942029 | 0.910569 | 0.818351 |
| 47 | 47 | 5  | 64 | 7  | 0.87037  | 0.927536 | 0.902439 | 0.801572 |
| 48 | 47 | 5  | 64 | 7  | 0.87037  | 0.927536 | 0.902439 | 0.801572 |
| 49 | 47 | 4  | 65 | 7  | 0.87037  | 0.942029 | 0.910569 | 0.818351 |
| 50 | 47 | 4  | 65 | 7  | 0.87037  | 0.942029 | 0.910569 | 0.818351 |

|     |    |   |    |    |          |          |          |          |
|-----|----|---|----|----|----------|----------|----------|----------|
| 51  | 47 | 3 | 66 | 7  | 0.87037  | 0.956522 | 0.918699 | 0.835456 |
| 52  | 47 | 3 | 66 | 7  | 0.87037  | 0.956522 | 0.918699 | 0.835456 |
| 53  | 47 | 3 | 66 | 7  | 0.87037  | 0.956522 | 0.918699 | 0.835456 |
| 54  | 47 | 3 | 66 | 7  | 0.87037  | 0.956522 | 0.918699 | 0.835456 |
| 55  | 47 | 3 | 66 | 7  | 0.87037  | 0.956522 | 0.918699 | 0.835456 |
| 56  | 46 | 3 | 66 | 8  | 0.851852 | 0.956522 | 0.910569 | 0.819445 |
| 57  | 47 | 3 | 66 | 7  | 0.87037  | 0.956522 | 0.918699 | 0.835456 |
| 58  | 47 | 3 | 66 | 7  | 0.87037  | 0.956522 | 0.918699 | 0.835456 |
| 59  | 46 | 3 | 66 | 8  | 0.851852 | 0.956522 | 0.910569 | 0.819445 |
| 60  | 46 | 3 | 66 | 8  | 0.851852 | 0.956522 | 0.910569 | 0.819445 |
| 61  | 46 | 3 | 66 | 8  | 0.851852 | 0.956522 | 0.910569 | 0.819445 |
| 62  | 46 | 3 | 66 | 8  | 0.851852 | 0.956522 | 0.910569 | 0.819445 |
| 63  | 46 | 3 | 66 | 8  | 0.851852 | 0.956522 | 0.910569 | 0.819445 |
| 64  | 46 | 4 | 65 | 8  | 0.851852 | 0.942029 | 0.902439 | 0.802103 |
| 65  | 46 | 4 | 65 | 8  | 0.851852 | 0.942029 | 0.902439 | 0.802103 |
| 66  | 45 | 4 | 65 | 9  | 0.833333 | 0.942029 | 0.894309 | 0.785981 |
| 67  | 43 | 4 | 65 | 11 | 0.796296 | 0.942029 | 0.878049 | 0.754073 |
| 68  | 46 | 4 | 65 | 8  | 0.851852 | 0.942029 | 0.902439 | 0.802103 |
| 69  | 46 | 4 | 65 | 8  | 0.851852 | 0.942029 | 0.902439 | 0.802103 |
| 70  | 46 | 4 | 65 | 8  | 0.851852 | 0.942029 | 0.902439 | 0.802103 |
| 71  | 44 | 4 | 65 | 10 | 0.814815 | 0.942029 | 0.886179 | 0.769975 |
| 72  | 43 | 4 | 65 | 11 | 0.796296 | 0.942029 | 0.878049 | 0.754073 |
| 73  | 43 | 4 | 65 | 11 | 0.796296 | 0.942029 | 0.878049 | 0.754073 |
| 74  | 43 | 4 | 65 | 11 | 0.796296 | 0.942029 | 0.878049 | 0.754073 |
| 75  | 46 | 4 | 65 | 8  | 0.851852 | 0.942029 | 0.902439 | 0.802103 |
| 76  | 46 | 4 | 65 | 8  | 0.851852 | 0.942029 | 0.902439 | 0.802103 |
| 77  | 45 | 4 | 65 | 9  | 0.833333 | 0.942029 | 0.894309 | 0.785981 |
| 78  | 45 | 4 | 65 | 9  | 0.833333 | 0.942029 | 0.894309 | 0.785981 |
| 79  | 46 | 4 | 65 | 8  | 0.851852 | 0.942029 | 0.902439 | 0.802103 |
| 80  | 46 | 4 | 65 | 8  | 0.851852 | 0.942029 | 0.902439 | 0.802103 |
| 81  | 45 | 4 | 65 | 9  | 0.833333 | 0.942029 | 0.894309 | 0.785981 |
| 82  | 45 | 4 | 65 | 9  | 0.833333 | 0.942029 | 0.894309 | 0.785981 |
| 83  | 45 | 4 | 65 | 9  | 0.833333 | 0.942029 | 0.894309 | 0.785981 |
| 84  | 44 | 4 | 65 | 10 | 0.814815 | 0.942029 | 0.886179 | 0.769975 |
| 85  | 45 | 4 | 65 | 9  | 0.833333 | 0.942029 | 0.894309 | 0.785981 |
| 86  | 44 | 4 | 65 | 10 | 0.814815 | 0.942029 | 0.886179 | 0.769975 |
| 87  | 44 | 4 | 65 | 10 | 0.814815 | 0.942029 | 0.886179 | 0.769975 |
| 88  | 44 | 4 | 65 | 10 | 0.814815 | 0.942029 | 0.886179 | 0.769975 |
| 89  | 44 | 4 | 65 | 10 | 0.814815 | 0.942029 | 0.886179 | 0.769975 |
| 90  | 44 | 4 | 65 | 10 | 0.814815 | 0.942029 | 0.886179 | 0.769975 |
| 91  | 44 | 4 | 65 | 10 | 0.814815 | 0.942029 | 0.886179 | 0.769975 |
| 92  | 45 | 4 | 65 | 9  | 0.833333 | 0.942029 | 0.894309 | 0.785981 |
| 93  | 45 | 4 | 65 | 9  | 0.833333 | 0.942029 | 0.894309 | 0.785981 |
| 94  | 46 | 4 | 65 | 8  | 0.851852 | 0.942029 | 0.902439 | 0.802103 |
| 95  | 46 | 4 | 65 | 8  | 0.851852 | 0.942029 | 0.902439 | 0.802103 |
| 96  | 45 | 4 | 65 | 9  | 0.833333 | 0.942029 | 0.894309 | 0.785981 |
| 97  | 45 | 4 | 65 | 9  | 0.833333 | 0.942029 | 0.894309 | 0.785981 |
| 98  | 45 | 4 | 65 | 9  | 0.833333 | 0.942029 | 0.894309 | 0.785981 |
| 99  | 46 | 4 | 65 | 8  | 0.851852 | 0.942029 | 0.902439 | 0.802103 |
| 100 | 45 | 4 | 65 | 9  | 0.833333 | 0.942029 | 0.894309 | 0.785981 |
